# Supplementary material for: The role of the light chain in the structure and binding activity of two cattle antibodies that neutralize bovine respiratory syncytial virus
Source: PubMed Central journal article supplement (PMC6677920; doi:10.1016/j.molimm.2019.04.026), 2019-08
Supplement: mmc1.pdf [file mmc1.pdf]

## Supplementary data

Figure S1

Sequences of Fab variable domains. CDRs defined according to Kabat E.A., Wu,T.T., Perry,H., Gottesman,K. and Foeller,C. (1991) *Sequences of Proteins of Immunological Interest*, Fifth Edition. NIH Publication No. 91-3242.

### (a) VH

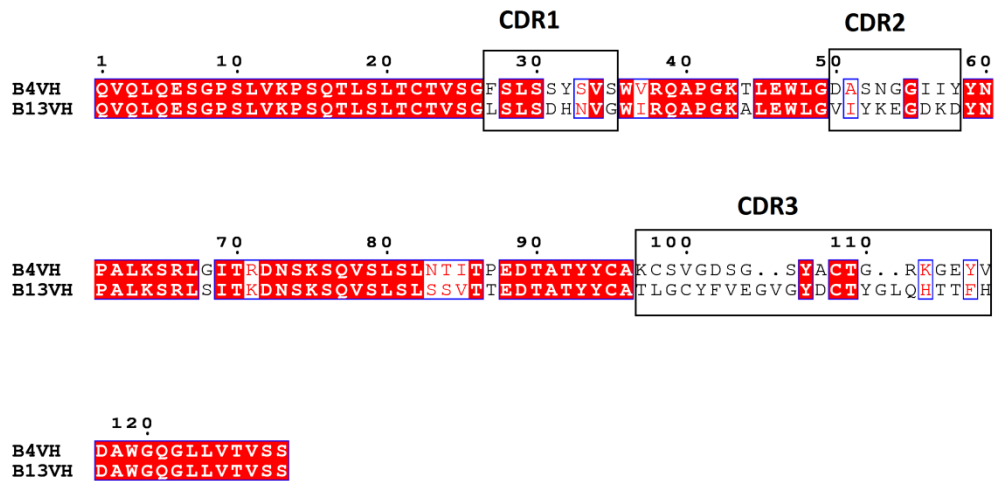

### (b) VL

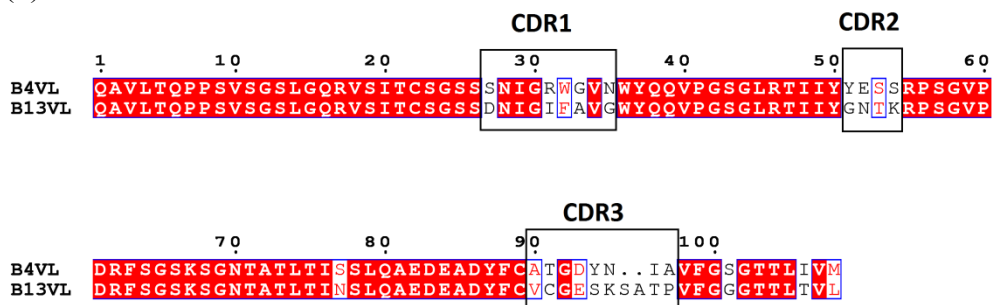

Table S1

Analysis of the variable region interface of the bovine Fabs

|      | No of residues<br>in interface HC | No of residues<br>in interface LC | Interface<br>area/total surface<br>area HC (Å <sup>2</sup> ) | Interface<br>area/total surface<br>area LC (Å <sup>2</sup> ) |
|------|-----------------------------------|-----------------------------------|--------------------------------------------------------------|--------------------------------------------------------------|
| B4   | 28                                | 28                                | 972 / 6636                                                   | 970 / 5599                                                   |
| B4*  | 26                                | 28                                | 838 / 6557                                                   | 883 / 5645                                                   |
| B13  | 30                                | 31                                | 917 / 7216                                                   | 967 / 5692                                                   |
| B13* | 31                                | 25                                | 952 / 6912                                                   | 993 / 5637                                                   |

Table S2

Buffer conditions for crystallization of bovine Fabs

| Fab  | Crystallization screen | Crystallization condition                                                           |
|------|------------------------|-------------------------------------------------------------------------------------|
| B4   | Index, Well F8         | 0.2 M Ammonium Sulphate<br>25.0% w/v Polyethylene Glycol 3350<br>0.1 M HEPES pH 7.5 |
| B4*  | JCSG+, Well A9         | 20.0% w/v Polyethylene glycol 3350<br>0.2 M Ammonium Chloride                       |
| B13  | JCSG+, Well C3         | 20.0% w/v Polyethylene glycol 3350<br>0.2 M Ammonium Nitrate                        |
| B13* | Index, Well D11        | 28.0% w/v Polyethylene Glycol Monomethyl Ether 2000<br>0.1 M bis-Tris pH 6.5        |
